# Supplementary material for: An easily manipulated protocol for patterning of MXenes on paper for planar micro-supercapacitors
Source: Royal Society of Chemistry journal article supplement (doi:10.1039/c7ta04735e), 2017-01-01
Supplement: c7ta04735e1.pdf [file c7ta04735e1.pdf]

## **Supporting Information**

### **An easily-manipulated protocol for patterning of MXene on paper for planar micro-supercapacitors**

Haibo Hu, Tao Hua\*

Nanotechnology Center, Institute of Textiles & Clothing, The Hong Kong Polytechnic  
University, Hung Hom, Kowloon, Hong Kong. \*E-mail: tao.hua@polyu.edu.hk

Keywords: MXene,  $\text{Ti}_3\text{C}_2\text{Tx}$ , micro-supercapacitors, planar

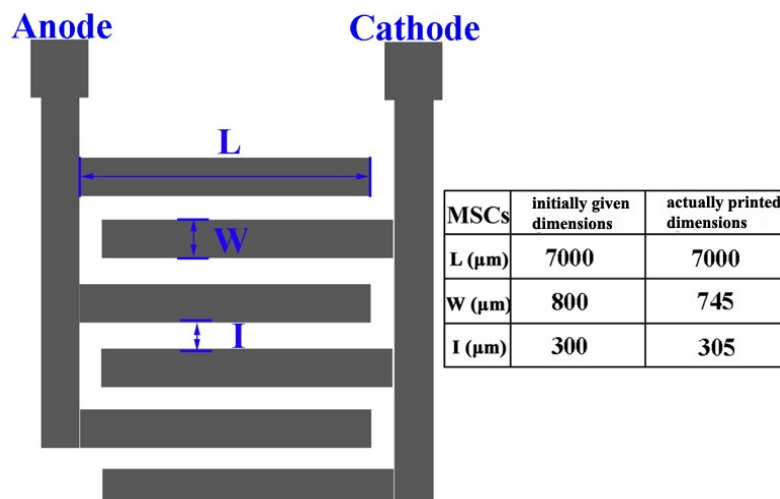

Figure S1. The initially given and actually printed dimensions of designed coplanar interdigital electrodes.

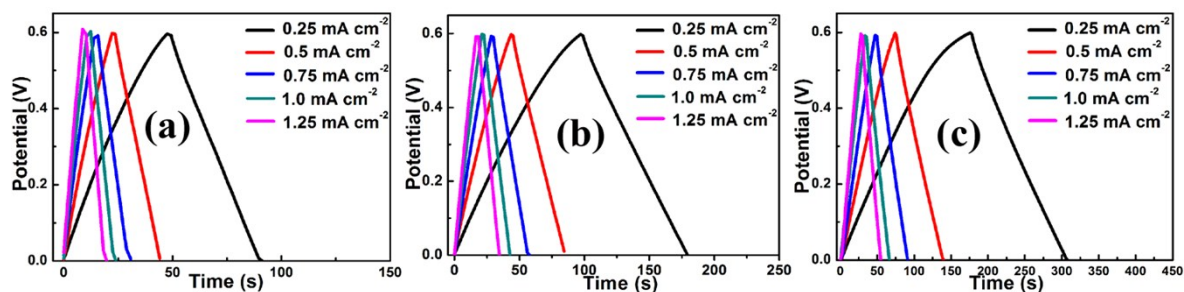

Figure S2. GCD curves of the as-fabricated all-solid-state planar MSCs based on fully delaminated few-layered MXene flakes within a voltage range of 0-0.6 V at different current densities, a) for MSC-25; b) for MSC-50 and c) for MSC-75.

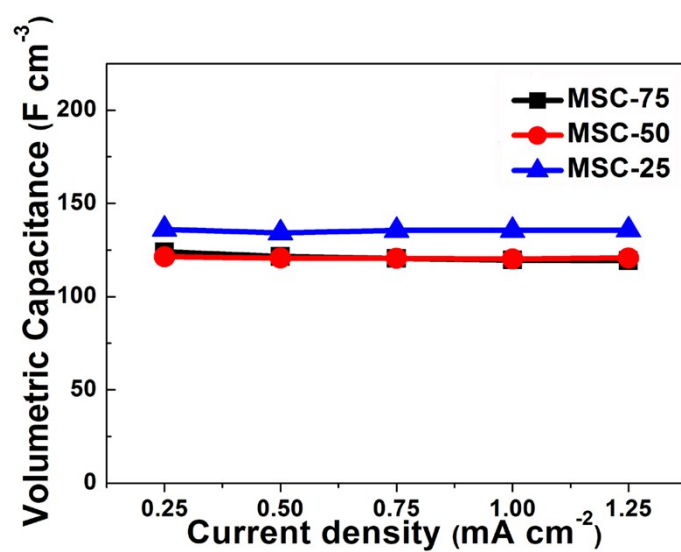

Figure S3. Evolution of the volumetric capacitance of the obtained MXene-based planar all-solid-state MSCs with different thickness of MXene active layer versus current density;

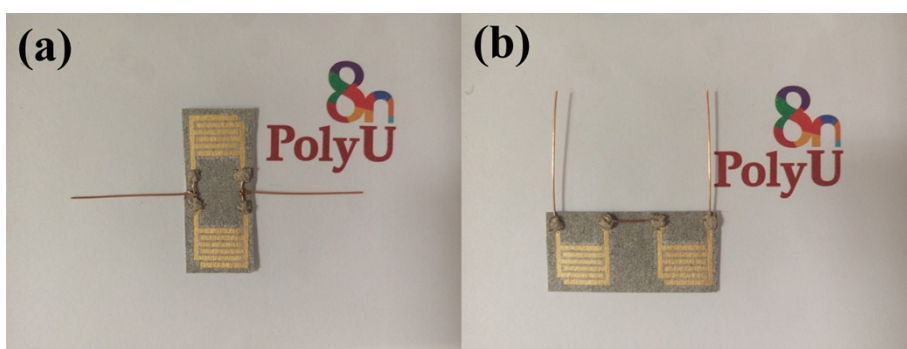

Figure S4. Digital photos of the two devices connected in (a) parallel or (b) tandem

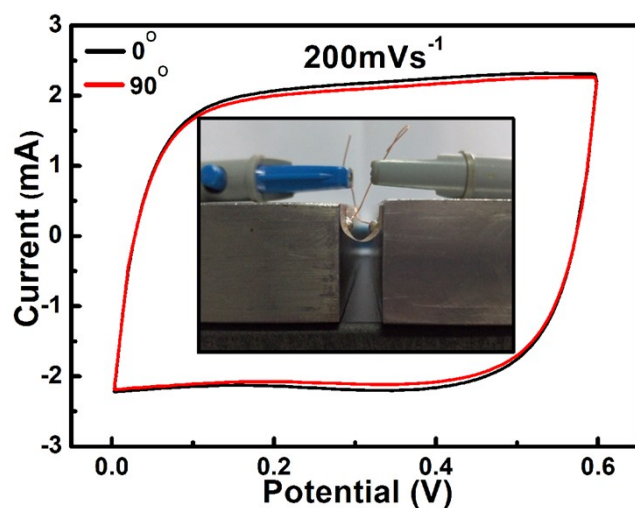

Figure S5. Cyclic voltammetry curves of the MSC-75 under normal and bent conditions at a scan rate of  $200 \text{ mV s}^{-1}$ , and the inset shows a photograph of the bent device;

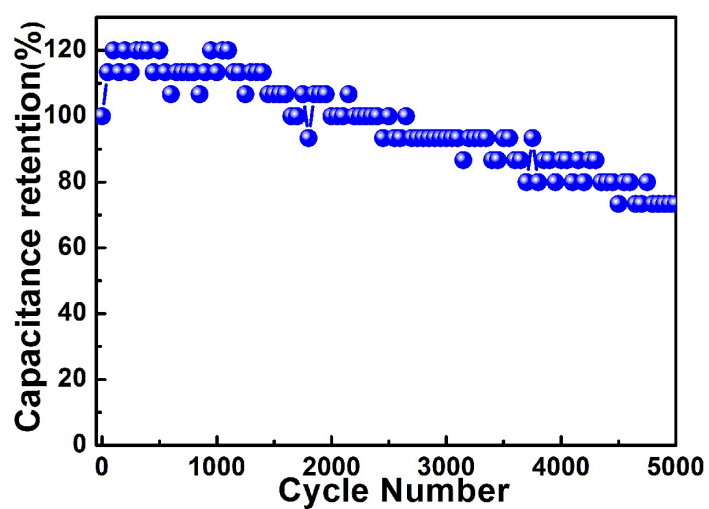

Figure S6. Cyclic stability test of the MSC-75 under a current density of  $1.0 \text{ mA cm}^{-2}$ ;
